# Supplementary material
Source: MDPI journal article supplement (https://www.mdpi.com/2227-9717/12/1/34)
Supplement: s1 [file s1]

# Supplementary Material

## Aza-Michael Additions of Benzylamine to Acrylates Promoted by Microwaves and Conventional Heating Using DBU as Catalyst via Solvent-Free Protocol

Leticia Chavelas-Hernández <sup>1</sup>, Luis G. Hernández-Vázquez <sup>1</sup>, José D. Bahena-Martínez <sup>1</sup>, Alexa B. Arroyo-Colín <sup>1</sup>, Sinuhe G. Flores-Ororio <sup>1</sup>, Gabriel Navarrete-Vázquez <sup>2</sup> and Jaime Escalante <sup>1,\*</sup>

<sup>1</sup> Instituto de Investigación en Ciencias Básicas y Aplicadas, Centro de Investigaciones Químicas, Universidad Autónoma del Estado de Morelos, Av. Universidad 1001, Chamilpa, Cuernavaca 62210, Mexico;  
leticia.chavelas@uaem.edu.mx (L.C.-H.); luishdezv@uaem.mx (L.G.H.-V.);  
jose.bahenam@uaem.edu.mx (J.D.B.-M.); alexa.arroyocl@uaem.edu.mx (A.B.A.-C.);  
sinuhe.osorioflo@uaem.edu.mx (S.G.F.-O.)

<sup>2</sup> Facultad de Farmacia, Universidad Autónoma del Estado de Morelos, Cuernavaca 62209, Mexico;  
gabriel\_navarrete@uaem.mx

\* Correspondence: jaime@uaem.mx; Tel.: +52-777-3297997 (ext. 6040)

### Experimental Part

**General.** All chemicals used for, were obtained commercially (Aldrich) and used without further purification. Reactions were monitored by TLC on Al plates coated with silica gel with fluorescent indicator (60 F<sub>254</sub>). Column chromatography (CC) was performed on silica gel (230-400 mesh Merck). Melting points were measured in open capillary tubes using a Melt-temp electrothermal apparatus and are uncorrected. The reactions with microwaves were carried out in Discover CEM equipment. NMR Spectra: Varian Gemini at 200 (<sup>1</sup>H) and 50 MHz (<sup>13</sup>C), Varian Inova at 400 (<sup>1</sup>H) and 100 MHz (<sup>13</sup>C), Bruker AVANCE III HD 500 MHz (<sup>1</sup>H) and 125 MHz (<sup>13</sup>C), spectra were obtained in chloroform-D (99.8%) +0.03% V/V TMS of Cambridge Isotope Laboratories, Inc. The chemical shift ( $\delta$  in ppm rel. to Me<sub>4</sub>Si as internal standard, *J* in Hz. HR-MS: MStation JMS-700 JEOL apparatus, in *m/z*.

**Method for (rac)-methyl 3-(benzylamino)-3-(4-nitrophenyl)propanoate (3), (E)-N-benzyl-3-(4-nitrophenyl)acrylamide (4).** Into a glass microwave reaction vessel a 5 mL flask provided with magnetic stirrer were added methyl 3-(4-nitrophenyl)acrylate **1** (0.5 mmol), benzylamine (2 mmol) and DBU (30  $\mu$ L, 0.1 mmol). The reaction was heating at 75 °C and 75 W in microwave for 10 min. After completion the reaction was purified on column, hexane/ethyl acetate 80:20 was used for separation. **Compound 3.** Yield: 36%. <sup>1</sup>H NMR (600 MHz, CDCl<sub>3</sub>):  $\delta$  2.04 (s, 1H), 2.62 (dd, *J* = 15.9, 5.2 Hz, 1H), 2.72 (dd, *J* = 15.9, 8.6 Hz, 1H), 3.54 (d, *J* = 13.2 Hz, 1H), 3.63 (d, *J* = 12.3 Hz, 1H), 3.64 (s, 3H), 4.23 (dd, *J* = 8.6, 5.2 Hz, 1H), 7.22-7.34 (m, 5H), 7.57 (d, *J* = 8.7 Hz, 2H), 8.22 (d, *J* = 8.7 Hz, 2H). <sup>13</sup>C NMR (150 MHz, CDCl<sub>3</sub>):  $\delta$  42.47, 51.56, 51.99, 58.37, 124.07, 127.33, 128.18, 128.28, 128.62, 139.66, 147.58, 150.38, 171.64. **Compound 4.** <sup>1</sup>H NMR (600 MHz, CDCl<sub>3</sub>):  $\delta$ : 4.59 (d, *J* = 5.6 Hz, 2H), 6.09 (s, 1H), 6.55 (d, *J* = 15.6 Hz, 1H), 7.28-7.39 (m, 5H), 7.63 (d, *J* = 8.7 Hz, 2H), 7.72 (d, *J* = 15.6 Hz, 1H), 8.22 (d, *J* = 8.7 Hz, 2H). <sup>13</sup>C NMR (150 MHz, CDCl<sub>3</sub>):  $\delta$ : 44.20, 124.31, 124.68, 127.95, 128.11, 128.53, 129.00, 137.88, 139.02, 141.15, 148.32, 164.76. Data were consistent with that reported [30].

**Method for (rac)-tert-butyl 3-(benzylamino)-3-(4-nitrophenyl)propanoate (5).** Into a glass microwave reaction vessel of 5 mL flask provided with magnetic stirrer were added *tert*-butyl 3-(4-nitrophenyl)acrylate **2** (0.5 mmol) benzylamine (2 mmol) and DBU (30  $\mu$ L, 0.1 mmol). The reaction

was heating at 75 °C and 75 W in microwave for 10 min. After completion the reaction was purified on column, hexane/ethyl acetate 80:20 was used for separation. Yield: 44%. <sup>1</sup>H NMR (200 MHz, CDCl<sub>3</sub>) δ (ppm) 1.38 (s, 9H, *tert*-Bu), 1.99 (br, 1H, NH), 2.48-2.71 (m, 2H, CH<sub>2</sub>), 3.46-3.66 (t, 2H, CH<sub>2</sub>), 4.10-4.23 (m, 1H, CH), 7.12-8.28 (m, 9H, Ar-H). <sup>13</sup>C NMR (50 MHz, CDCl<sub>3</sub>) δ (ppm) 28.0, 43.7, 51.54, 58.6, 81.2, 123.7, 127.1, 128.0, 128.1, 128.4, 139.6, 150.5, 170.2. FAB-MS: 357 ([M + H]<sup>+</sup>). HR-FAB-MS: 357.18 ([M + H]<sup>+</sup>, C<sub>7</sub>H<sub>14</sub>NO<sup>+</sup>; calc. 356.42).

**Method for (rac)-methyl 3-(benzylamino)-3-(4-methoxyphenyl)propanoate (8) and N-benzyl-3-(4-methoxyphenyl)acrylamide (9).** Into a glass microwave reaction vessel containing a magnetic stirrer, were added methyl 3-(4-methoxyphenyl)acrylate **6** (0.192 g, 1 mmol), benzylamine (440 μL, 4 mmol) and DBU (30 μL, 0.2 mmol). The mixture was placed in a *Discover CEM* equipment at 130 °C, 100 W (20 W) and 1 psi, during 2 h. After completion the reaction was concentrated to dryness and purified on column, hexane/ethyl acetate 95:5 to 80:20 was used for separation. **Compound 8.** Yield: 38 %. (yellow oil) <sup>1</sup>H NMR (200 MHz, CDCl<sub>3</sub>) δ (ppm), 1.92 (s, 1H, NH), 2.66 (m, 2H, CH<sub>2</sub>CO), 3.63 (s, 3H, CH<sub>3</sub>O), 3.42-3.73 (m, 2H, CH<sub>2</sub>Ph), 3.81 (s, 3H, CH<sub>3</sub>O), 4.07 (m, 1H, CH), 6.79-7.43 (m, 9H, Ar-H); <sup>13</sup>C NMR (50 MHz, CDCl<sub>3</sub>) δ (ppm) 43.10, 51.37, 51.71, 55.39, 58.30, 114.13, 127.01, 128.27, 128.32, 128.47, 134.64, 140.47, 159.11, 172.45. **Compound 9.** Yield: 10%. <sup>1</sup>H NMR (200 MHz, CDCl<sub>3</sub>) δ (ppm), 3.81 (s, 3H, CH<sub>3</sub>O), 4.52 (d, *J* = 6, 2 Hz, 2H, CH<sub>2</sub>Ph), 6.16 (br, 1H, NH), 6.27 (d, *J* = 6 Hz, 1H, CH), 6.74-7.54 (m, 9H, Ar-H), 7.58 (d, *J* = 8 Hz, 1H, CHPh). <sup>13</sup>C NMR (50 MHz, CDCl<sub>3</sub>) δ (ppm), 43.90, 55.44, 114.35, 118.24, 127.60, 127.99, 128.81, 129.47, 138.49, 141.05, 161.01, 166.35. Data were consistent with that reported [31,32].

**Method for (rac)-tert-butyl 3-(benzylamino)-3-(4-methoxyphenyl)propanoate (10).** Into a glass microwave reaction vessel containing a magnetic stirrer, were added *tert*-butyl 3-(4-methoxyphenyl)acrylate **7** (0.234 g, 1 mmol), benzylamine (440 μL, 4 mmol) and DBU (30 μL, 0.2 mmol). The mixture was placed in a *Discover CEM* equipment at 130 °C, 100 W (20 W) and 1 psi, during 2 h. After completion the reaction was concentrated to dryness and purified on column, hexane/ethyl acetate 95:5 to 80:20 was used for separation. Yield: 39 %. (yellow oil). <sup>1</sup>H NMR (200 MHz, CDCl<sub>3</sub>) δ (ppm), 1.37 (s, 9H, *tert*-Bu), 2.04 (br, 1H, NH), 2.42-2.79 (m, 2H, CH<sub>2</sub>CO), 3.44-3.68 (m, 2H, CH<sub>2</sub>Ph), 3.82 (s, 3H, CH<sub>3</sub>O), 4.05 (m, 1H, CH), 6.67-7.46 (m, 9H, Ar-H); <sup>13</sup>C NMR (50 MHz, CDCl<sub>3</sub>) δ (ppm) 28.0, 44.3, 51.3, 55.2, 58.5, 80.5, 113.8, 126.8, 128.3, 134.7, 140.4, 158.8, 171.1. Elemental analysis for C<sub>21</sub>H<sub>27</sub>NO<sub>3</sub>: Observed: %C = 74.0614, %H = 7.7957, %N = 4.0996, Calculate: %C = 73.8730, %H = 7.9700, %N = 4.1015.

**Method for (rac)-methyl 3-(benzylamino)-3-phenylpropanoate (13).** Into a flask containing a magnetic stirrer, were added methyl 3-phenylacrylate **11** (0.100 g, 0.62 mmol), benzylamine (270 μL, 2.48 mmol) and DBU (18.5 μL, 0.124 mmol). The mixture was placed in an oil bath at 75 °C for 4 h. After completion the reaction was concentrated to dryness and purified on column, hexane/ethyl acetate 95:5 to 80:20 was used for separation. Yield: 59 % (amber oil). <sup>1</sup>H NMR (500 MHz, CDCl<sub>3</sub>) δ (ppm): 2.25 (br, 1H, NH), 2.64 (dd, *J* = 15.6, 5.2 Hz, 1H, CH<sub>2</sub>CO<sub>2</sub>), 2.75 (dd, *J* = 15.6, 8.8 Hz, 1H, CH<sub>2</sub>CO<sub>2</sub>), 3.54 (d, *J* = 13.2 Hz, 1H, CH<sub>2</sub>Ph), 3.63 (s, 3H, CH<sub>3</sub>O), 3.66 (d, *J* = 13.2 Hz, 1H, CH<sub>2</sub>Ph), 4.12 (dd, *J* = 8.8, 5.2 Hz, 1H, CH), 7.22-7.37 (m, 10H, H-Ar); <sup>13</sup>C NMR (125 MHz, CDCl<sub>3</sub>) δ (ppm): 42.78, 51.25, 51.66, 58.80, 126.98, 127.19, 127.60, 128.21, 128.37, 128.67, 140.00, 142.26, 172.22. Data were consistent with that reported [33].

**Method for (E)-N-benzyl-3-phenylpropenamide (14).** Into a glass microwave reaction vessel containing a magnetic stirrer, were added methyl 3-phenylacrylate **11** (0.162 g, 1 mmol), benzylamine (436 μL, 4 mmol) and DBU (30 μL, 0.2 mmol). The mixture was placed in a *Discover CEM* equipment at 130 °C, 150 W and 1 psi, for 1.5 h. After completion the reaction was concentrated to dryness and purified on column, hexane/ethyl acetate 95:5 to 80:20 was used for separation. Yield: 32 % (white solid). <sup>1</sup>H-NMR (500 MHz, CDCl<sub>3</sub>) δ (ppm): 4.57 (d, *J* = 5.8 Hz, 2H, CH<sub>2</sub>Ph), 6.00 (br, 1H, NH), 6.42 (d, *J* = 15.6 Hz, 1H, CH=CH), 7.26-7.50 (m, 10 H, H-Ar), 7.67 (d, *J* =

15.6 Hz, 1H, CH=CH).  $^{13}\text{C}$  NMR (125 MHz,  $\text{CDCl}_3$ ),  $\delta$  (ppm): 44.02, 120.54, 127.74, 127.95, 128.08, 128.91, 128.96, 129.87, 134.92, 138.33, 141.59, 165.89. Data were consistent with that reported [34].

**Method for (rac)-tert-butyl 3-(benzylamino)-3-phenylpropanoate (15).** Into a glass microwave reaction vessel containing a magnetic stirrer, were added *tert*-butyl 3-phenylacrylate **12** (0.162 g, 1 mmol), benzylamine (436  $\mu\text{L}$ , 4 mmol) and DBU (30  $\mu\text{L}$ , 0.2 mmol). The mixture was placed in a *Discover CEM* equipment at 130  $^\circ\text{C}$ , 150 W and 1 psi, for 6 h. After completion the reaction was concentrated to dryness and purified on column, hexane/ethyl acetate 95:5 to 80:20 was used for separation. Yield: 74.34 % (Yellow oil),  $^1\text{H}$ -NMR (200 MHz,  $\text{CDCl}_3$ ),  $\delta$  (ppm), 1.36 (s, 9H, *tert*-Bu), 2.10 (br, 1H, NH), 2.57 (m, 2H,  $\text{CH}_2$ ), 3.56 (m, 2H,  $\text{CH}_2$ ), 4.08 (m, 1H, CH), 7.11-7.43 (m, 10H, Ar-H);  $^{13}\text{C}$  NMR (50 MHz,  $\text{CDCl}_3$ ),  $\delta$  (ppm), 28.0, 44.3, 51.4, 59.2, 80.6, 126.8, 127.2, 127.3, 128.1, 128.3, 128.4, 140.4, 142.7, 171.04. Data were consistent with that reported [35].

**Method for (rac)-methyl 3-(benzylamino)butanoate (17).** Into a glass microwave reaction vessel containing a magnetic stirrer, were added methyl crotonate **16** (106  $\mu\text{L}$ , 1 mmol), benzylamine (110  $\mu\text{L}$ , 4 mmol). The mixture was placed in a *Discover CEM* equipment at 75 $^\circ\text{C}$ , 50 W (15 W) for 4 h. After completion the reaction was purified by FC (hexane/ethyl acetate 8:2 to 60:40). Yield: 73 %. (yellow oil).  $^1\text{H}$  NMR (200 MHz,  $\text{CDCl}_3$ ),  $\delta$  (ppm), 1.16 (d,  $J$  = 5.9 Hz, 3H,  $\text{CH}_3$ ), 1.87 (br, 1H, NH), 2.63-2.11 (m, 2H), 3.16 (m, 1H), 3.67 (s, 3H,  $\text{CH}_3\text{O}$ ), 3.79 (d, 5.9 Hz), 7.21-7.33 (m, 5H, Ar-H),  $^{13}\text{C}$  NMR (150 MHz  $\text{CDCl}_3$ ),  $\delta$  (ppm), 20.54, 41.50, 49.74, 51.27, 51.60, 127.02, 128.19, 128.50, 140.43, 172.88. Spectroscopy data were compared with those reported [33].

**Method for (rac)-methyl 3-(benzylamino)-2-methylpropanoate (19).** A mixture of methyl methacrylate **18** (1 mmol, 0.1 g), benzylamine (1 mmol, 109.22  $\mu\text{L}$ ) and DBU (0.02 mmol, 3.98  $\mu\text{L}$ ) was placed into a microwave reaction vial provided with a magnetic stirrer. The capped vial was placed in a microwave synthesis equipment at 75  $^\circ\text{C}$  and 50 W for 4 h. The crude product was purified by FC (hexane/ethyl acetate 98:2 to 90:10) to produce ( $\pm$ )-**19**. Yield: 87 % (Colorless oil).  $^1\text{H}$  NMR (200 MHz  $\text{CDCl}_3$ ),  $\delta$  (ppm), 1.18 (d,  $J$  = 4 Hz, 3H,  $\text{CH}_3$ ); 1.61 (br, 1H, NH), 2.54-2.76 (m, 1H, CH-NH), 2.78-2.98 (m, 2H, CH), 3.68 (s, 3H,  $\text{CH}_3\text{O}$ ), 3.79 (s, 2H,  $\text{CH}_2\text{Ph}$ ), 7.09-7.49 (m, 5H, Ar-H).  $^{13}\text{C}$  NMR (50 MHz  $\text{CDCl}_3$ ),  $\delta$  (ppm), 15.5, 40.1, 51.8, 52.1, 53.8, 127.0, 128.1, 128.4, 140.0, 176.2. Spectroscopy data were compared with those reported [33].

**Method for (rac)-ethyl 3-(benzylamino)-2-phenylpropanoate (21).** Into a 10 mL flask provided with magnetic stirrer were added ethyl 2-phenylacrylate **20** (0.43 mmol, 75 mg), benzylamine (0.43 mmol, 0.046 g, 47  $\mu\text{L}$ ) and DBU (0.2 mmol, 1.31 mg, 1.3  $\mu\text{L}$ ). The reaction was kept a room temperature for 30 min. After was purified on column, hexane/ethyl acetate 8:2 was used for separation. Yield: 56% (colorless oil).  $^1\text{H}$  NMR (500 MHz,  $\text{CDCl}_3$ )  $\delta$  (ppm), 1.6 (d,  $J$  = 2 Hz, 3H,  $\text{CH}_3$ ), 1.63 (br, 1H, NH), 2.92 (dd,  $J$  = 5,  $J$  = 5, 1 H, CH), 3.28 (dd,  $J$  = 5 Hz,  $J$  = 5 Hz, 2H,  $\text{CH}_2$ ), 3.80 (s, 1H,  $\text{CH}_2\text{Ph}$ ), 3.82 (dd,  $J^3$  = 4 Hz,  $J^3$  = 4 Hz, 1 H, CH), 4.08-4.19 (m, 2 H,  $\text{CH}_2\text{CH}_3$ ), 7.21-7.33 (10H, Ar-H).  $^{13}\text{C}$  NMR (75 MHz  $\text{CDCl}_3$ ),  $\delta$  (ppm), 14.3, 52.3, 53.8, 61.0, 127.1, 127.6, 128.2, 128.2, 128.6, 128.9, 137.6, 140.3, 173.3. Spectroscopy data were compared with those reported [29].

**Method for methyl 3-(benzylamino)propanoate (23) and dimethyl 3,3'-(benzylazanediyl)dipropionate(24).** Into a 10 mL flask provided with magnetic stirrer were added methyl acrylate **22** (1 mmol, 90.62  $\mu\text{L}$ ) and benzylamine (1.1 mmol, 120  $\mu\text{L}$ ). The mixture was cooled to 0  $^\circ\text{C}$  during 2.5 h. After completion the reaction, the crude product was purified by FC (hexane/ethyl acetate 8:2). **Compound 23** Yield: 56 % (Colorless oil).  $^1\text{H}$  NMR (200 MHz,  $\text{CDCl}_3$ ),  $\delta$  (ppm), 1.83 (s, 1H, NH), 2.53 (t,  $J$  = 6.0 Hz, 2H,  $\text{CH}_2$ ), 2.89 (t,  $J$  = 3.37 Hz, 2H,  $\text{CH}_2$ ), 3.67 (t,  $J$  = 6.0 Hz, 2H,  $\text{CH}_2$ ), 3.80 (s, 2H,  $\text{CH}_2$ ), 7.30 (m, 5H, Ar-H).  $^{13}\text{C}$  NMR (50 MHz,  $\text{CDCl}_3$ )  $\delta$  (ppm), 34.5, 44.4, 51.5, 53.7, 126.9, 128.0, 128.3, 140.1, 173.1. **Compound 24** Yield: 5 %.  $^1\text{H}$  NMR (200 MHz,  $\text{CDCl}_3$ ),  $\delta$  (ppm), 2.47 (t,  $J$  = 6 Hz, 4H,  $\text{CH}_2$ ), 2.80 (t,  $J$  = 6 Hz, 4H,  $\text{CH}_2\text{-N}$ ), 3.58 (s, 2H,  $\text{CH}_2\text{Ph}$ ), 3.64 (s, 6H,  $\text{OCH}_3$ ) 7.27 (m, 5H, Ar-H).  $^{13}\text{C}$  NMR (50 MHz,  $\text{CDCl}_3$ )  $\delta$  (ppm), 32.6, 49.2, 51.4, 58.3, 127.0, 128.1, 128.6, 138.9, 172.8. Spectroscopy data were compared with those reported [23].

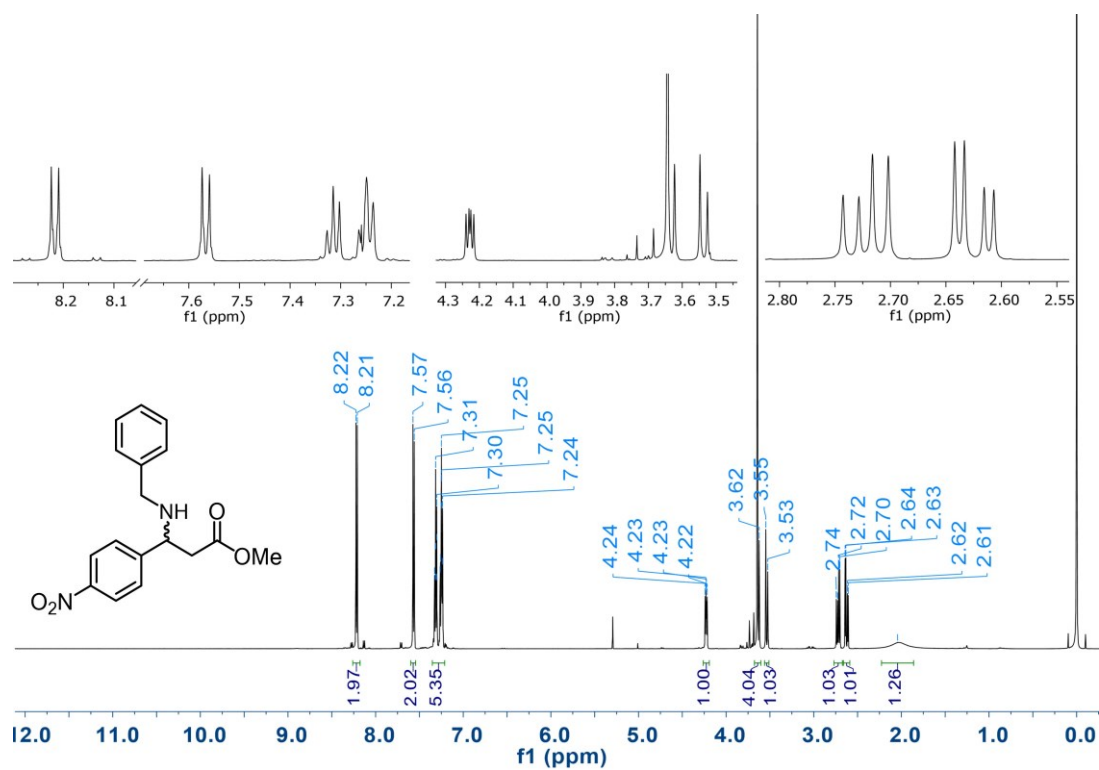

**Figure S1.** <sup>1</sup>H RMN (600 MHz, CDCl<sub>3</sub>) for (*rac*)-methyl 3-(benzylamino)-3-(4-nitrophenyl)propanoate **3**.

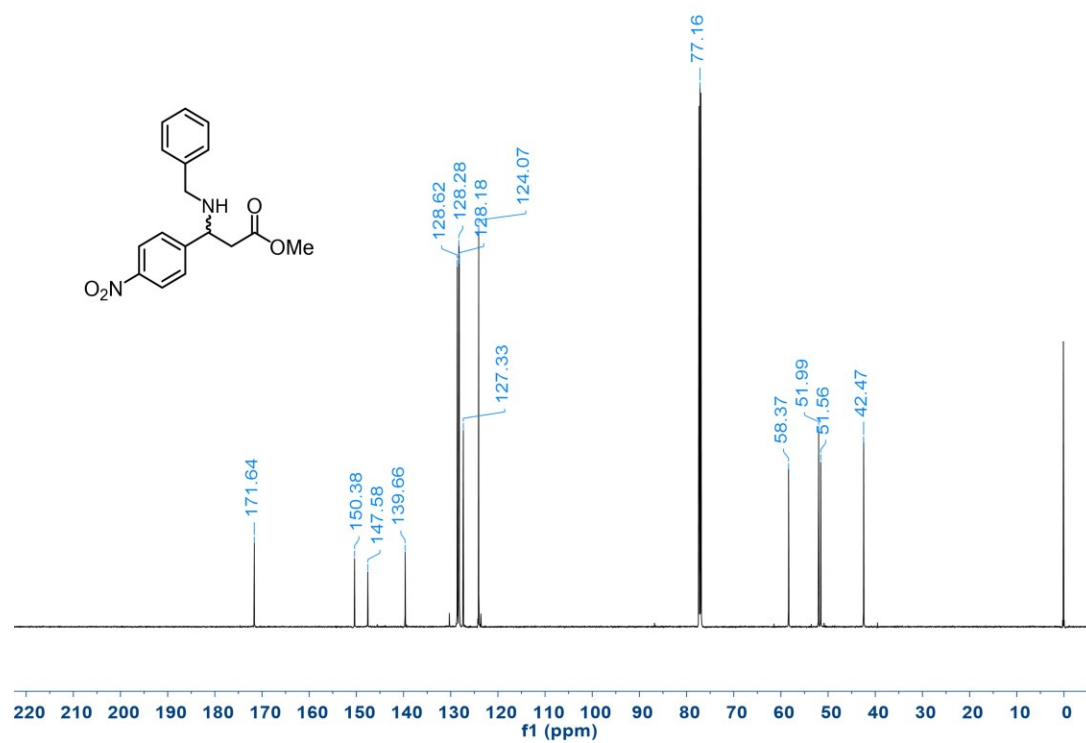

**Figure S2.** <sup>13</sup>C RMN (150 MHz, CDCl<sub>3</sub>) for (*rac*)-methyl 3-(benzylamino)-3-(4-nitrophenyl)propanoate **3**.

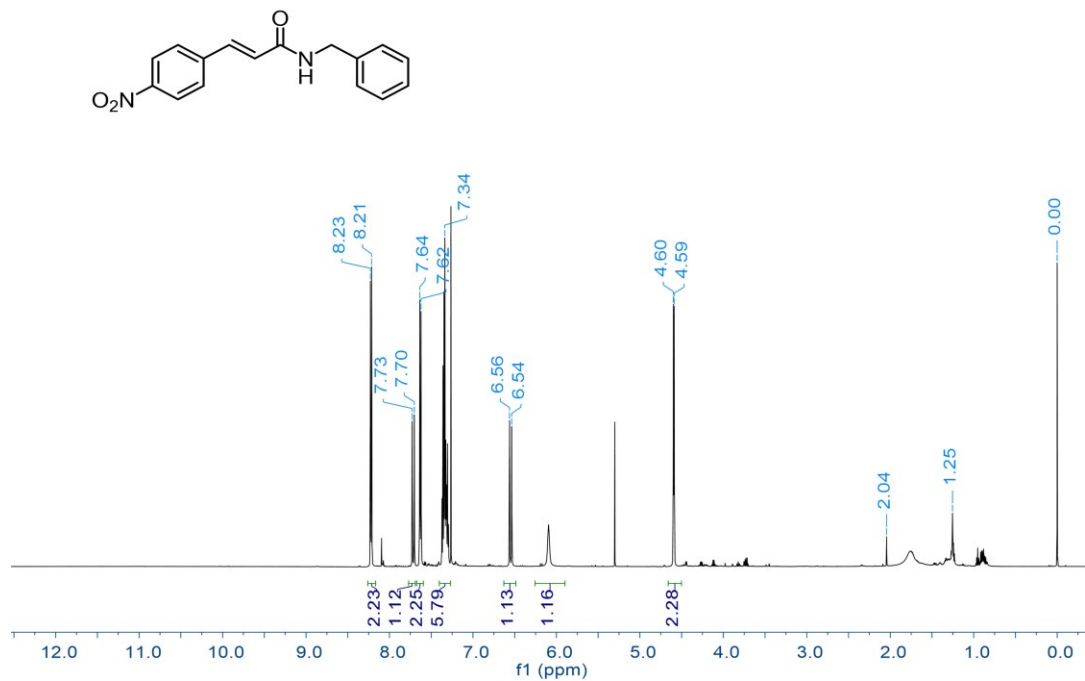

Figure S3.  $^1\text{H}$  NMR (600 MHz,  $\text{CDCl}_3$ ) for (*E*)-*N*-benzyl-3-(4-nitrophenyl)acrylamide **4**.

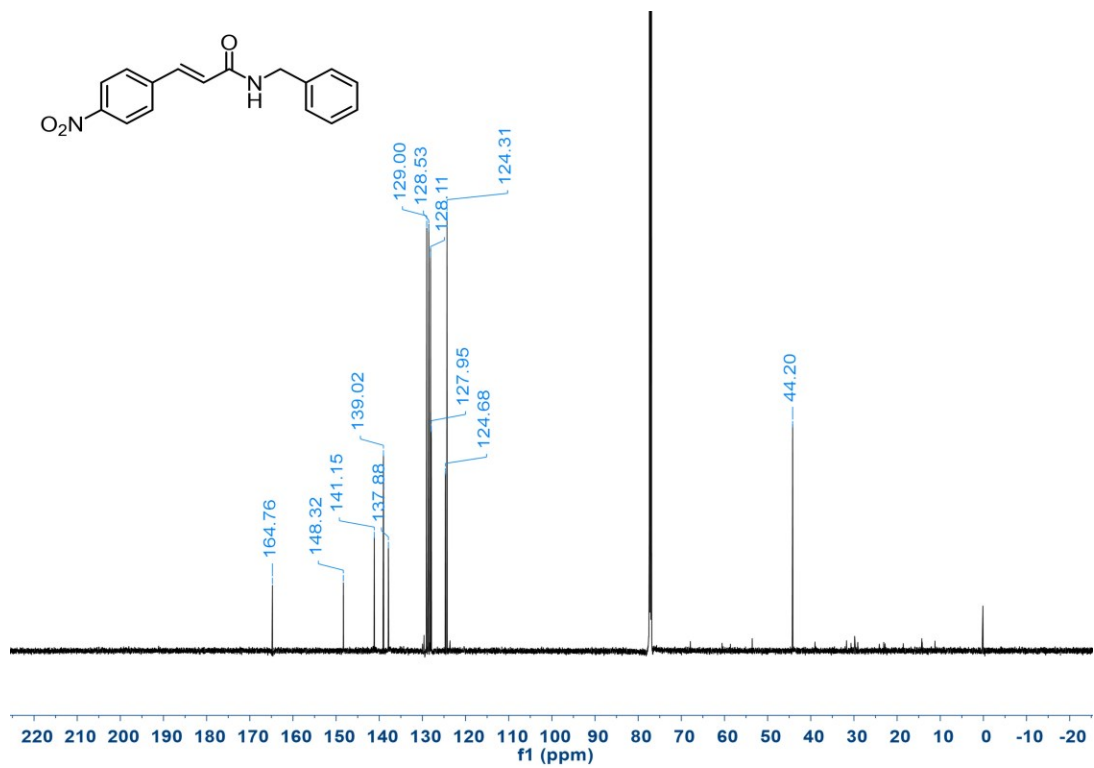

Figure S4.  $^{13}\text{C}$  NMR (150 MHz,  $\text{CDCl}_3$ ) for (*E*)-*N*-benzyl-3-(4-nitrophenyl)acrylamide **4**.

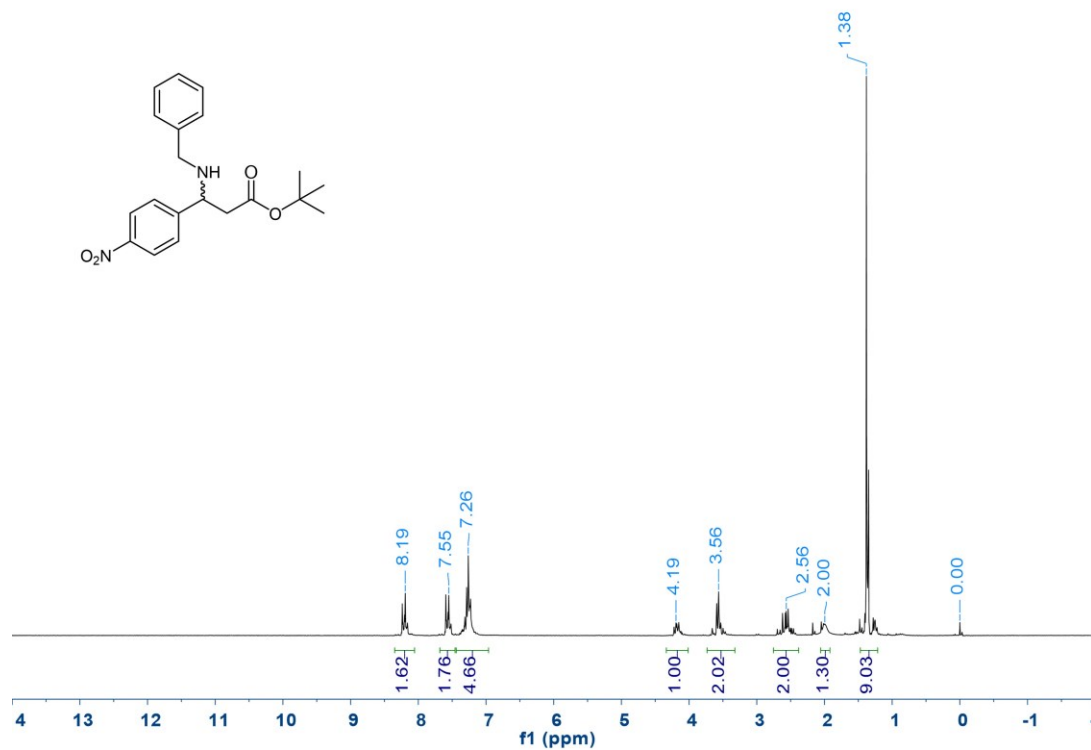

**Figure S5.** <sup>1</sup>H NMR (200 MHz, CDCl<sub>3</sub>) for (*rac*)-tert-butyl 3-(benzylamino)-3-(4-nitrophenyl)propanoate **5**.

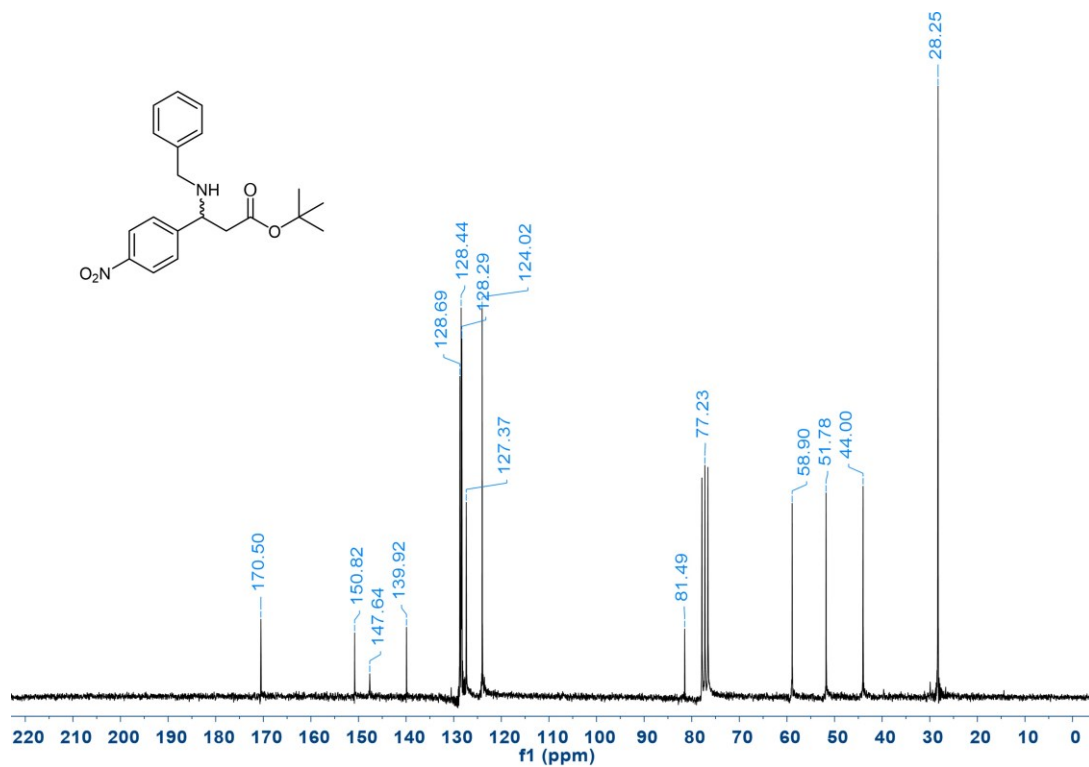

**Figure S6.** <sup>13</sup>C NMR (50 MHz, CDCl<sub>3</sub>) for (*rac*)-tert-butyl 3-(benzylamino)-3-(4-nitrophenyl)propanoate **5**.

[ Elemental Composition ]

Data : JEG012 Date : 02-Mar-2020 11:59  
 Sample: JEG09-45 Operator name M.en ITA Victoria Labastida G  
 Note : Dr.Jaime Escalante/Daniel Centro de Investigaciones Quimicas UAEM  
 Inlet : Direct Ion Mode : FAB+  
 RT : 3.64 min Scan#: (54,56)+5  
 Elements : C 40/0, H 49/0, O 6/0, N 2/0  
 Mass Tolerance : 1000ppm, 3mmu if m/z < 3, 5mmu if m/z > 5  
 Unsaturation (U.S.) : -0.5 - 10.0

| Observed m/z | Int%  | Err[ppm / mmu] | U.S. Composition      |
|--------------|-------|----------------|-----------------------|
| 357.1800     | 100.0 | -4.1 / -1.5    | 9.5 C 20 H 25 O 4 N 2 |

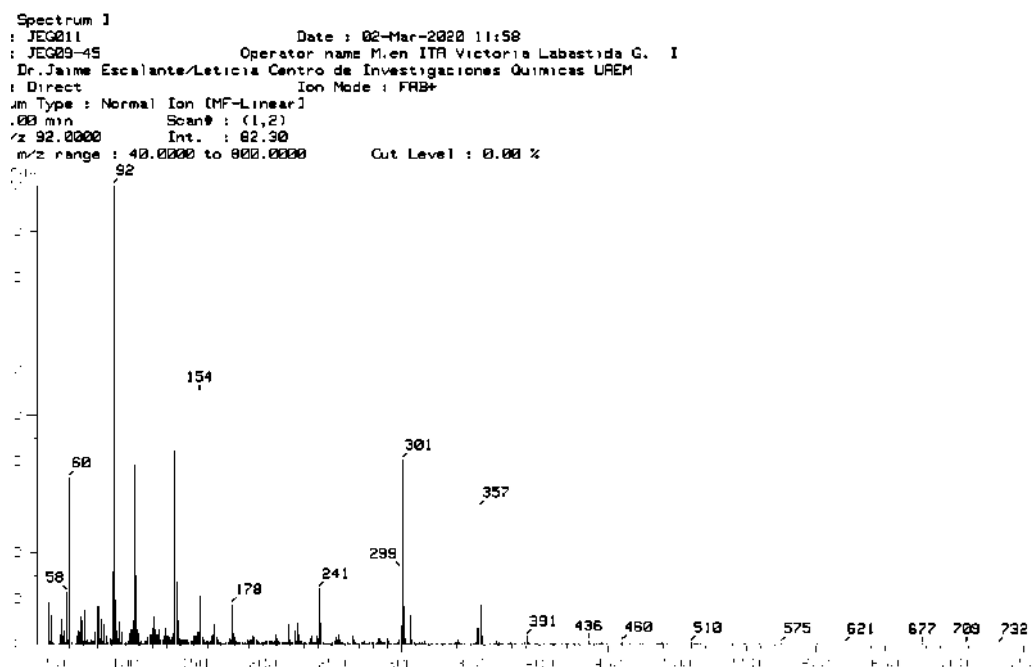

**Figure S7.** High Resolution Mass Spectrometry (HR-MS) for (*rac*)-*tert*-butyl 3-(benzylamino)-3-(4-nitrophenyl)propanoate **5**.

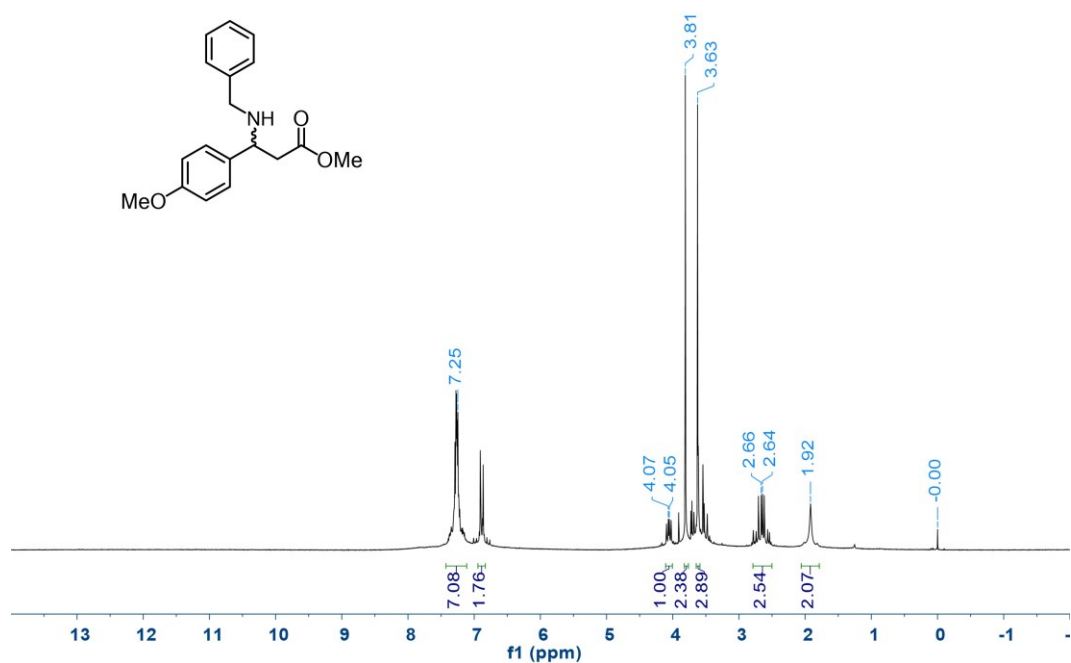

**Figure S8.** <sup>1</sup>H NMR (200 MHz, CDCl<sub>3</sub>) for (*rac*)-methyl 3-(benzylamino)-3-(4-methoxyphenyl)propanoate **8**.

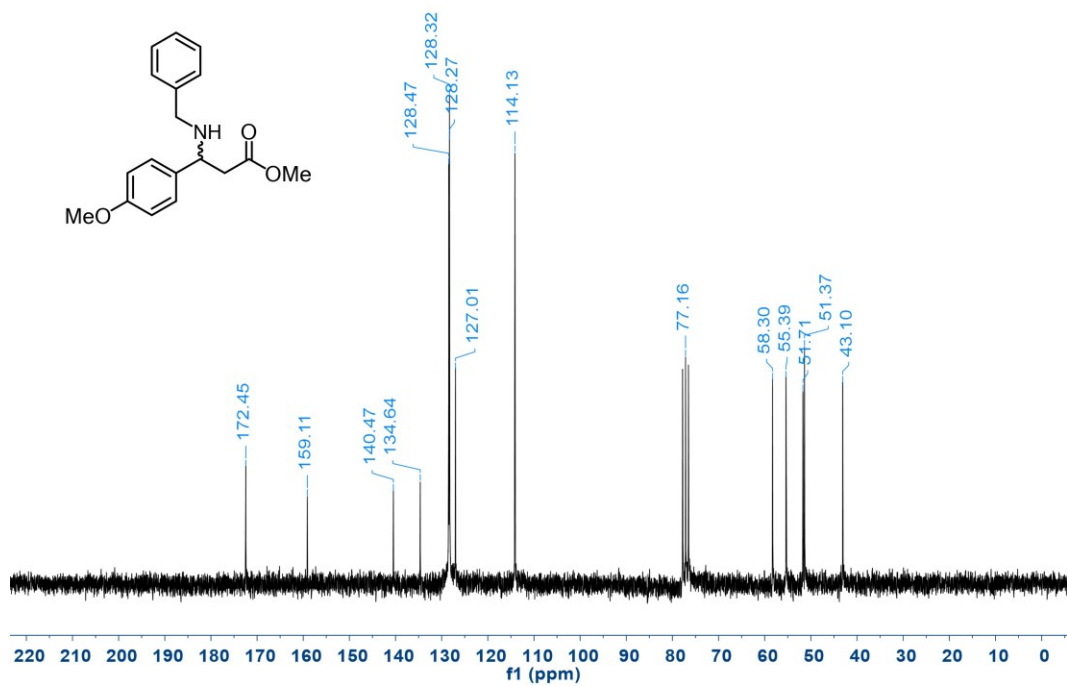

**Figure S9** <sup>13</sup>C NMR (50 MHz, CDCl<sub>3</sub>) for methyl (*rac*)-methyl 3-(benzylamino)-3-(4-methoxyphenyl)propanoate **8**.

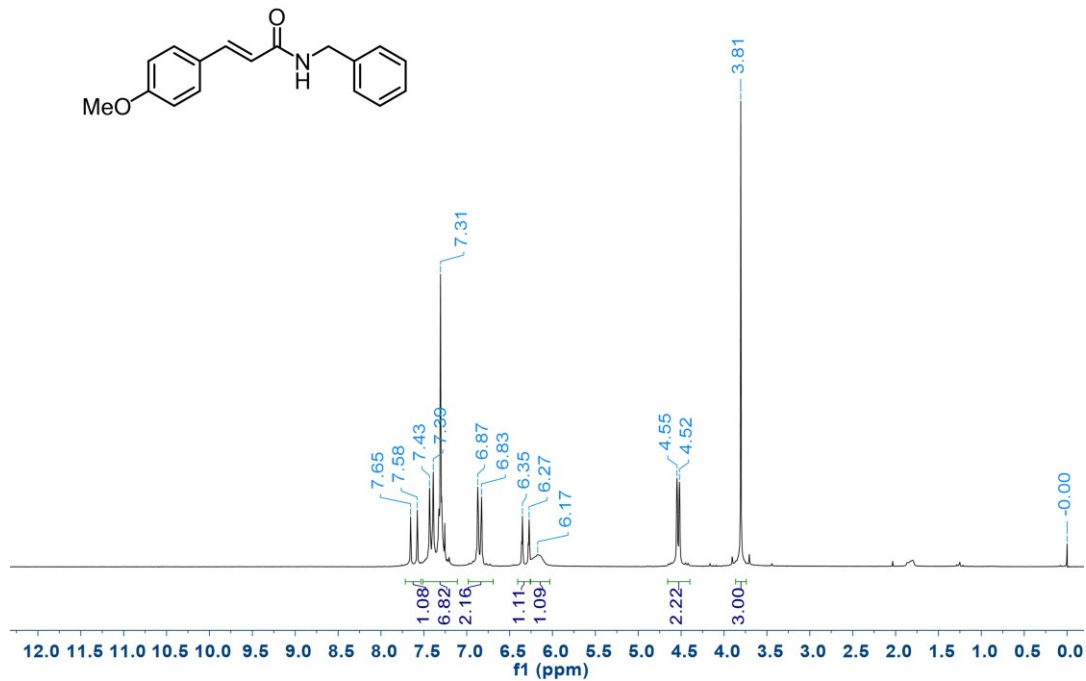

Figure S10.  $^1\text{H}$  NMR (200 MHz,  $\text{CDCl}_3$ ) for *N*-benzyl-3-(4-methoxyphenyl)acrylamide **9**.

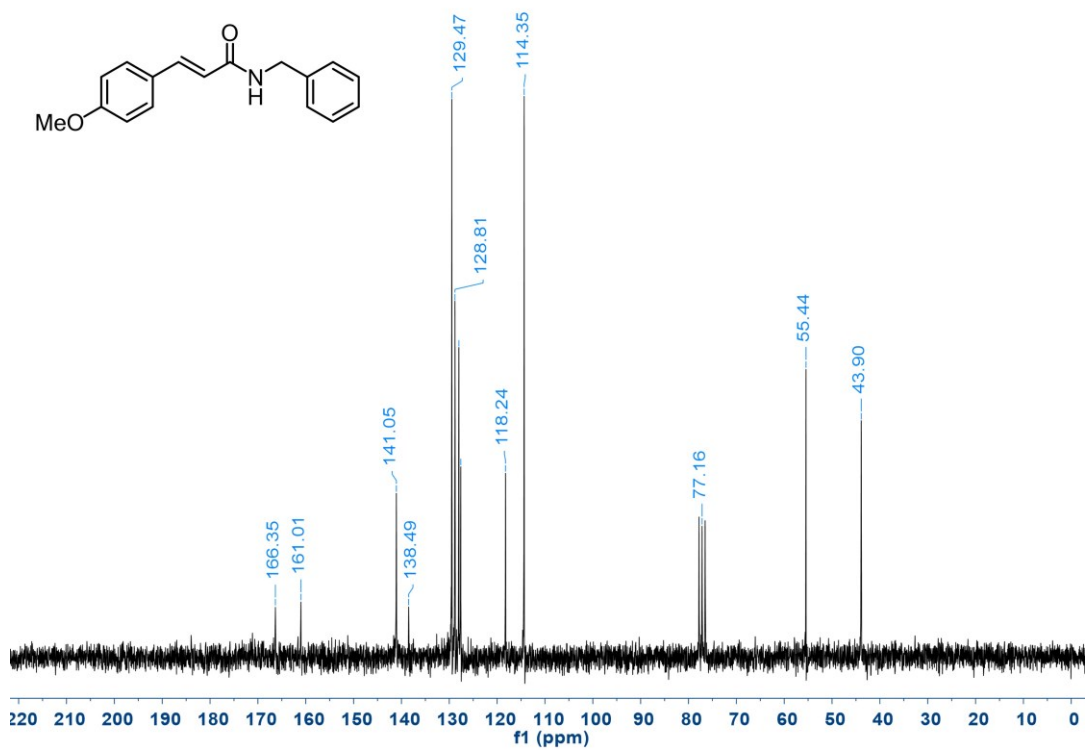

Figure S11.  $^{13}\text{C}$  NMR (50 MHz,  $\text{CDCl}_3$ ) for *N*-benzyl-3-(4-methoxyphenyl)acrylamide **9**.

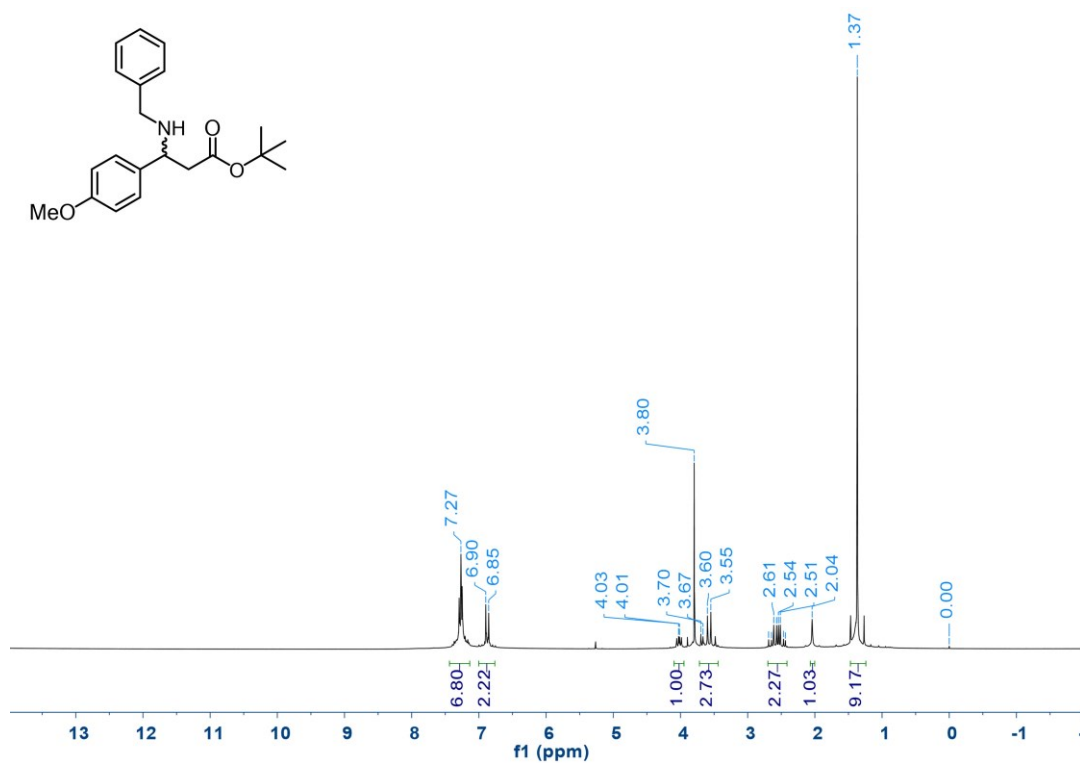

**Figure S12.** <sup>1</sup>H NMR (200 MHz, CDCl<sub>3</sub>) for *(rac)*-*tert*-butyl 3-(benzylamino)-3-(4-methoxyphenyl)propanoate **10**.

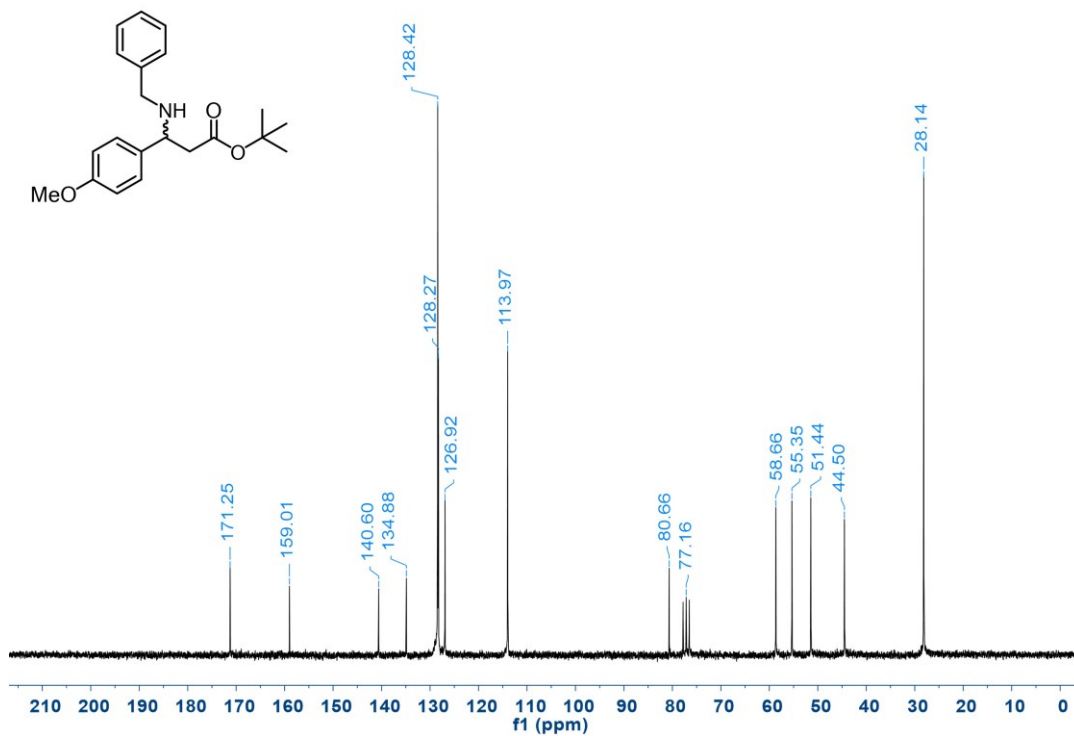

**Figure S13.** <sup>13</sup>C NMR (50 MHz, CDCl<sub>3</sub>) for *(rac)*-*tert*-butyl 3-(benzylamino)-3-(4-methoxyphenyl)propanoate **10**.

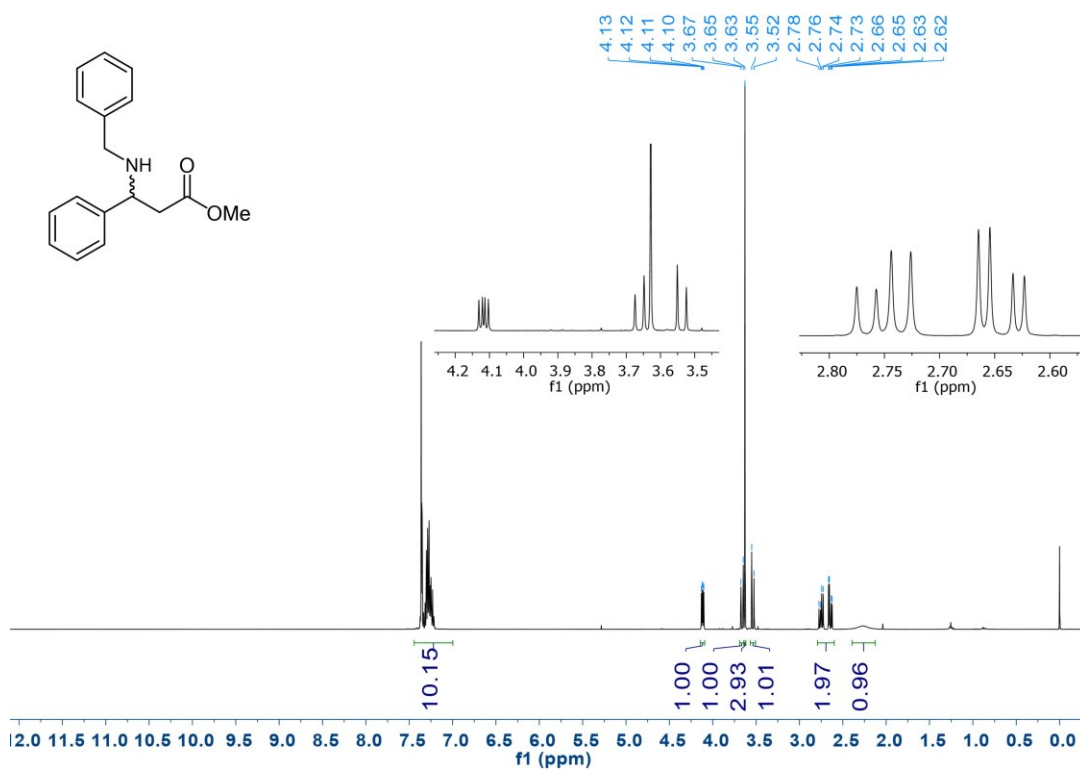

**Figure S14.** <sup>1</sup>H NMR (500 MHz, CDCl<sub>3</sub>) for (rac)-methyl 3-(benzylamino)-3-phenylpropanoate 13.

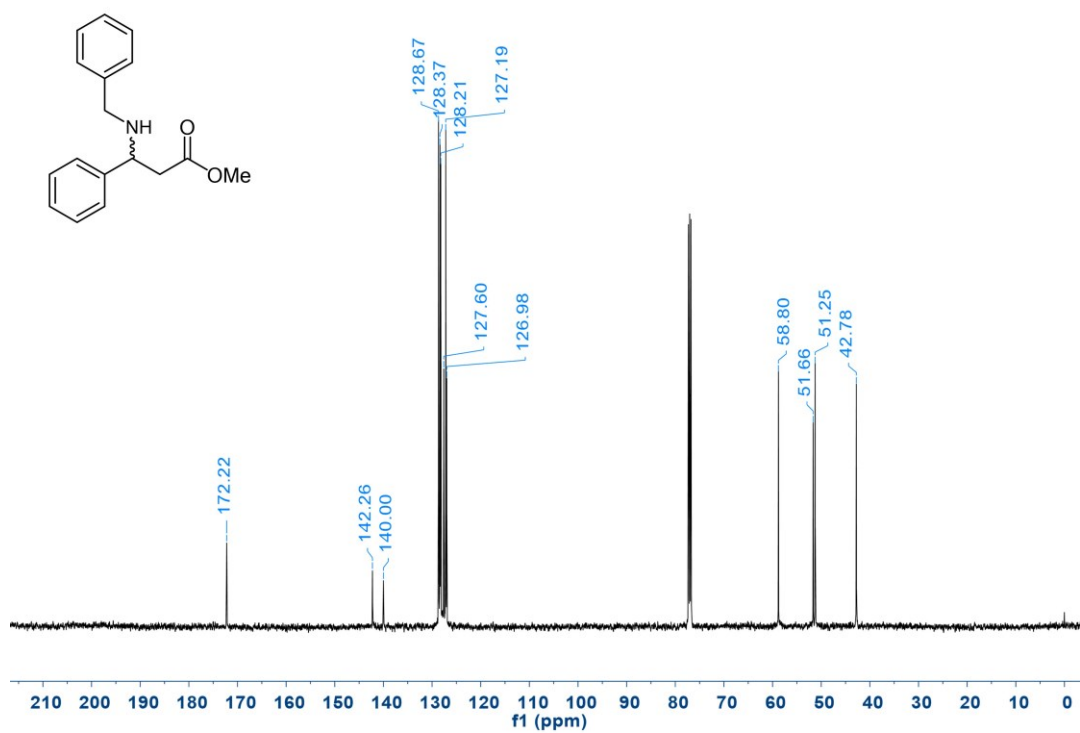

**Figure S15.** <sup>13</sup>C NMR (125 MHz, CDCl<sub>3</sub>) for (rac)-methyl 3-(benzylamino)-3-phenylpropanoate 13.

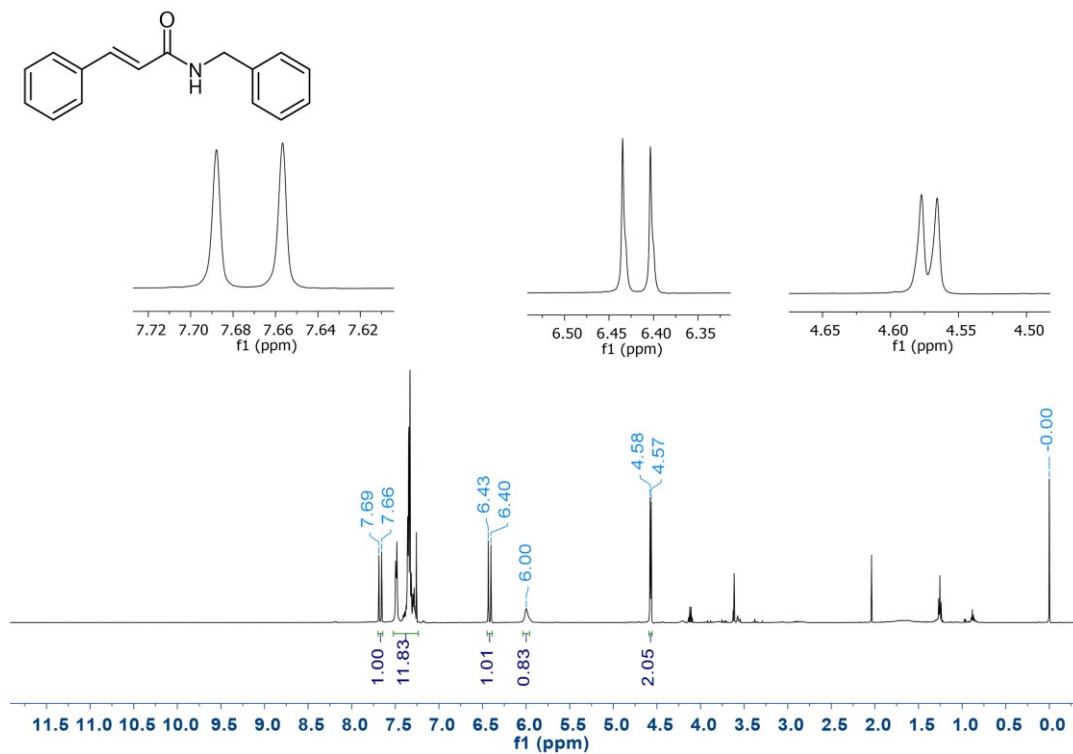

Figure S16.  $^1\text{H}$  NMR (500 MHz,  $\text{CDCl}_3$ ) for (*E*)-*N*-benzyl-3-phenylpropenamide **14**.

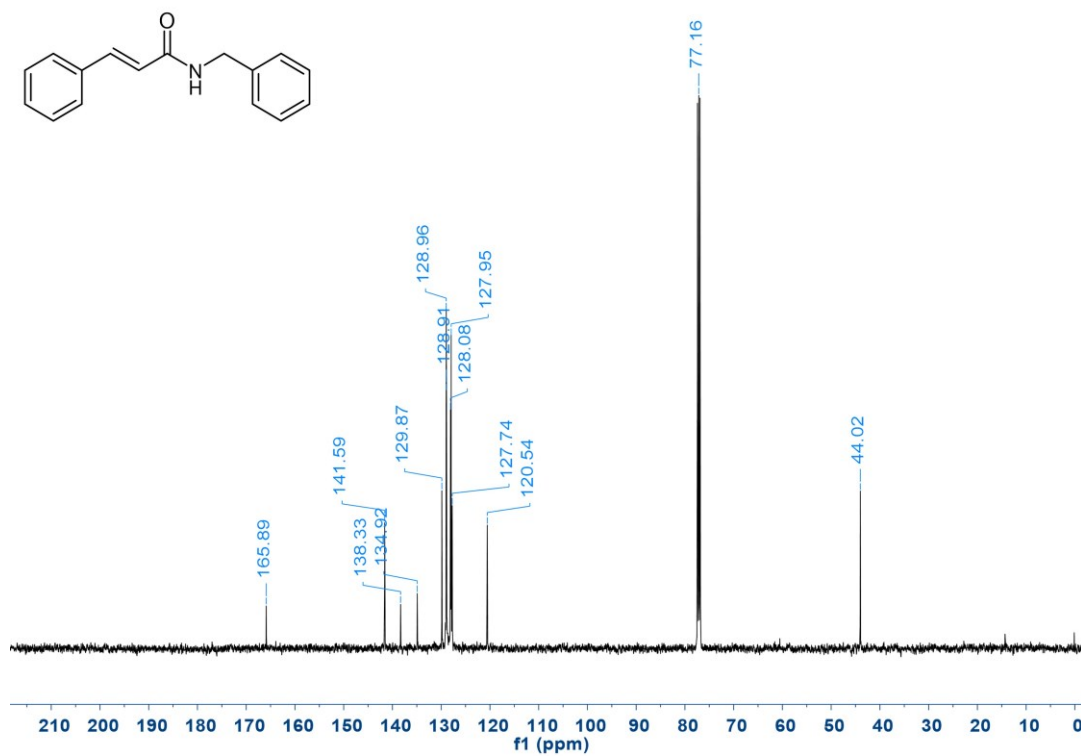

Figure S17.  $^{13}\text{C}$  NMR (125 MHz,  $\text{CDCl}_3$ ) for (*E*)-*N*-benzyl-3-phenylpropenamide **14**.

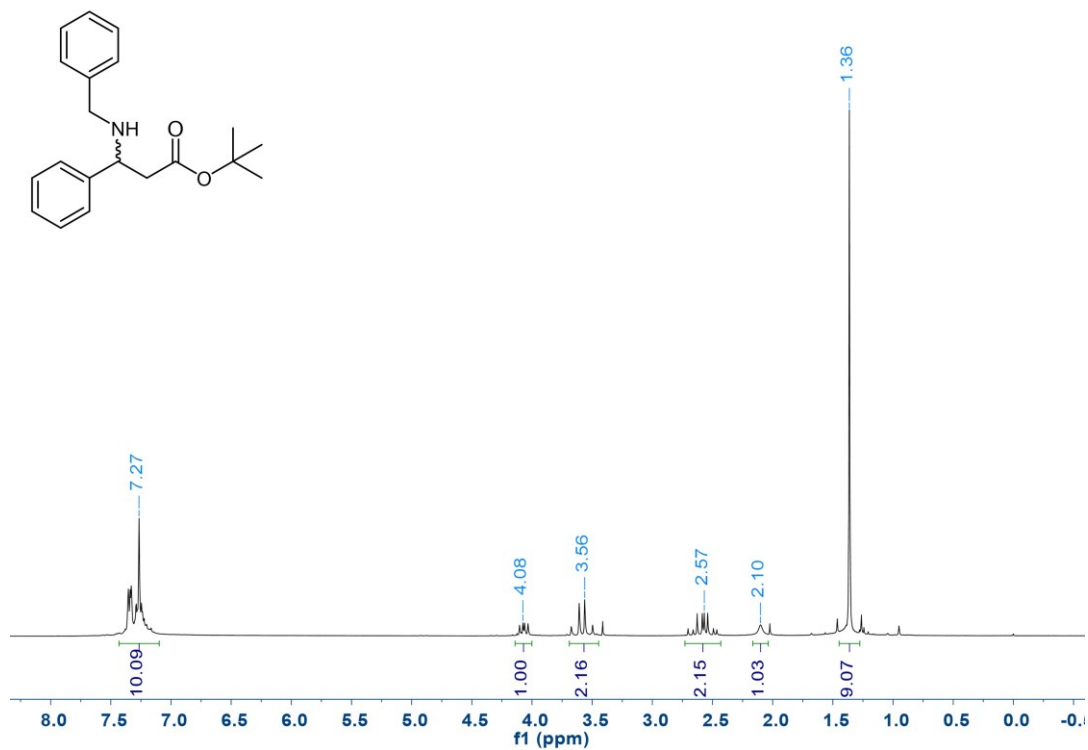

Figure S18. <sup>1</sup>H NMR (200 MHz, CDCl<sub>3</sub>) for *(rac)*-*tert*-butyl 3-(benzylamino)-3-phenylpropanoate **15**.

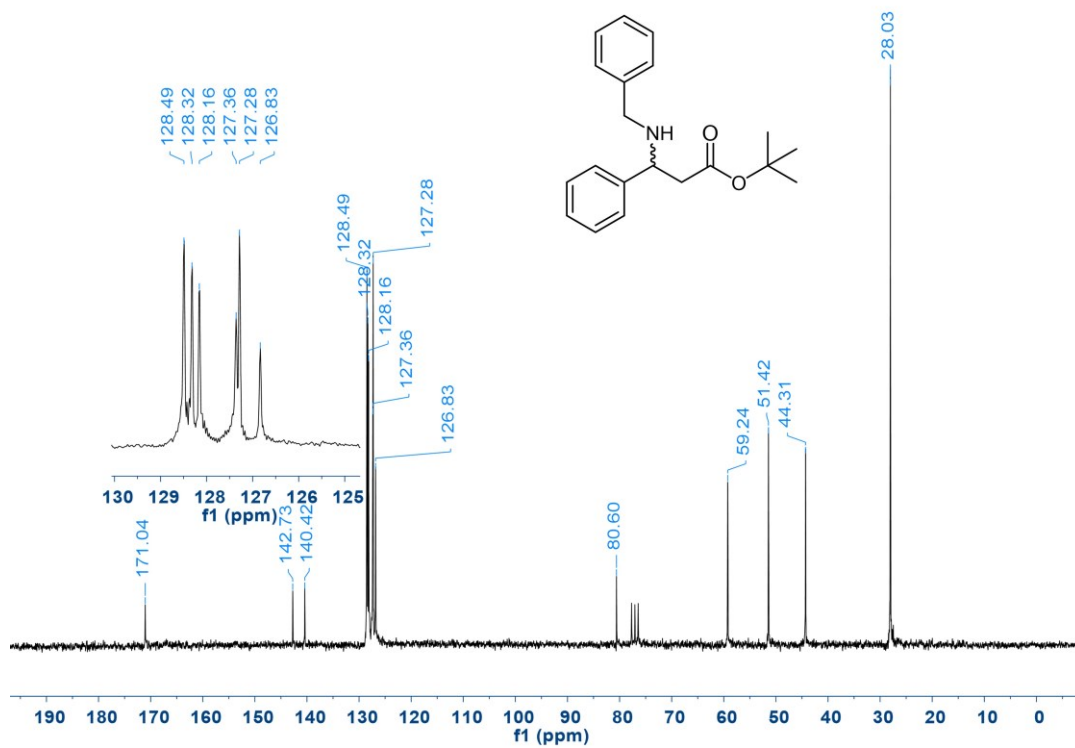

Figure S19. <sup>13</sup>C NMR (50 MHz, CDCl<sub>3</sub>) for *(rac)*-*tert*-butyl 3-(benzylamino)-3-phenylpropanoate **15**.

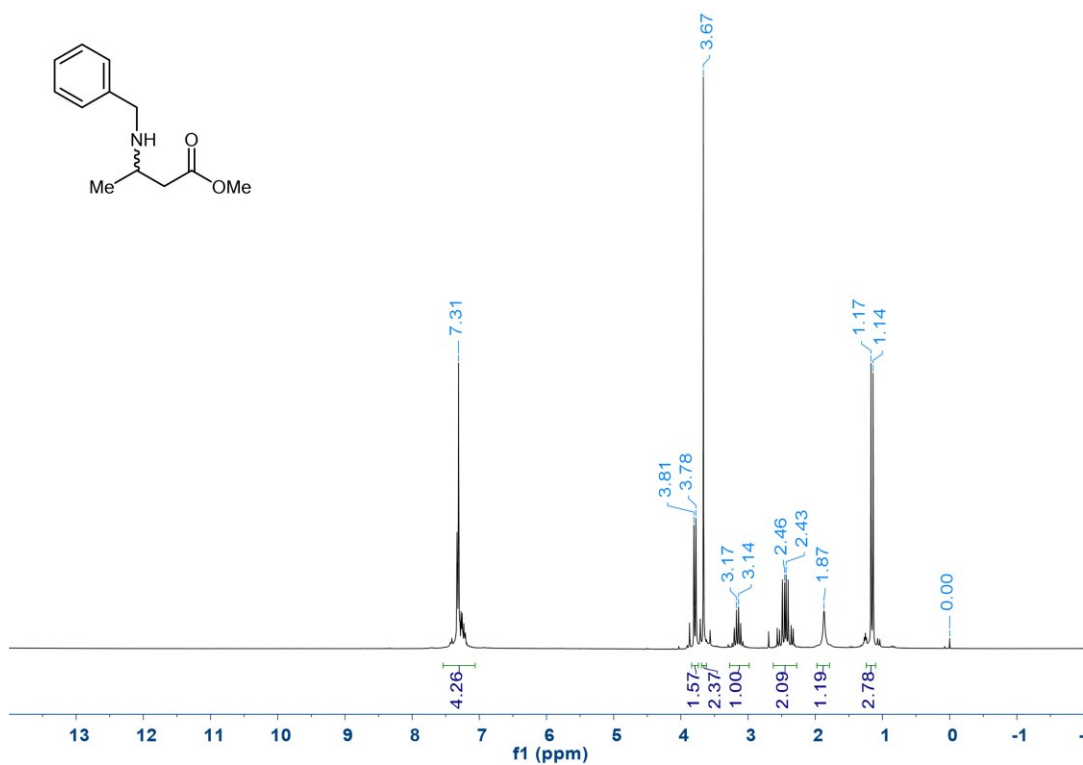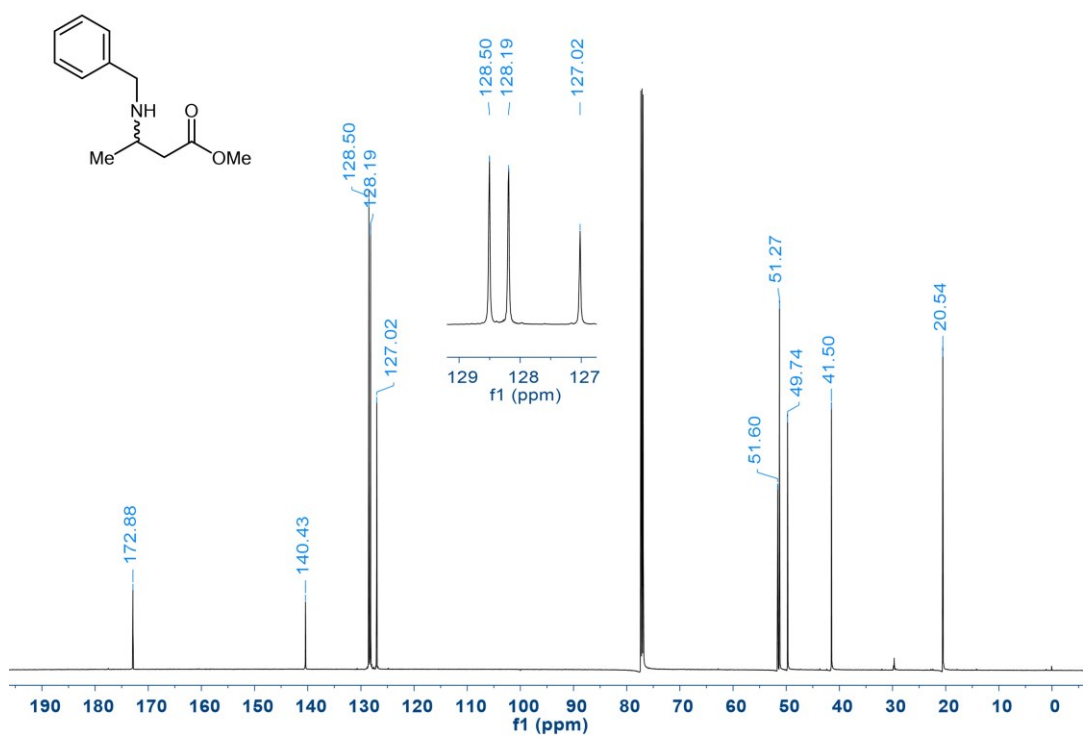

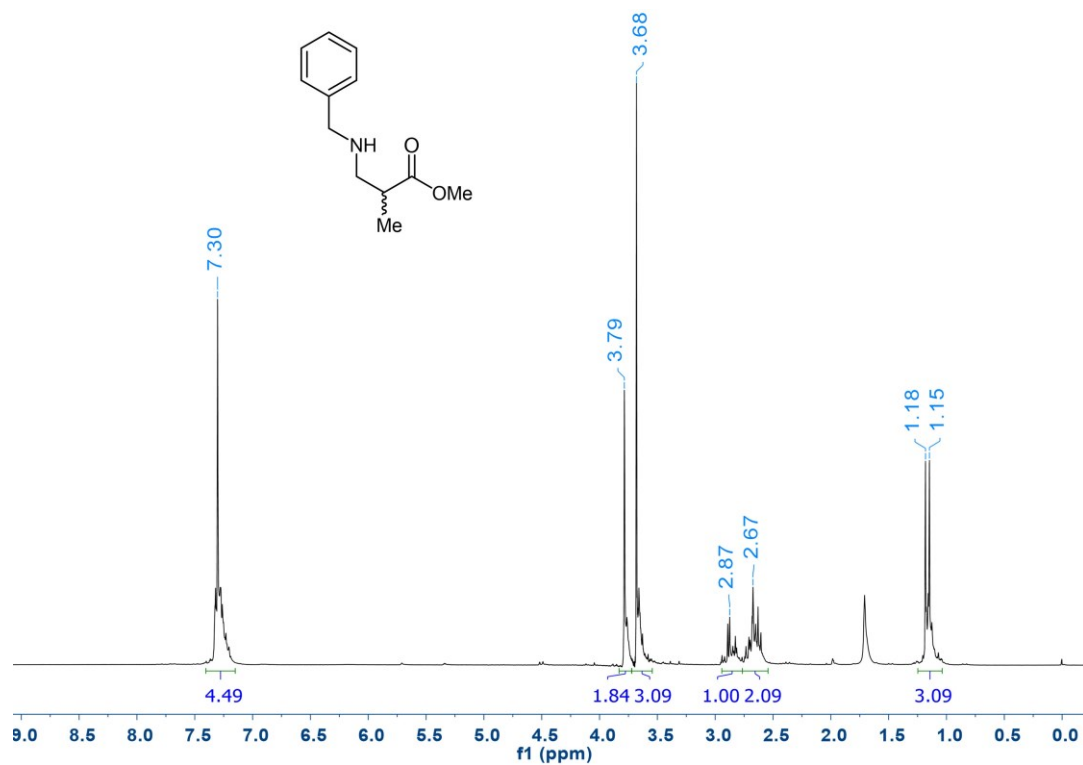

Figure S22. <sup>1</sup>H NMR (200 MHz, CDCl<sub>3</sub>) for (rac)-methyl 3-(benzylamino)-2-methylpropanoate 19.

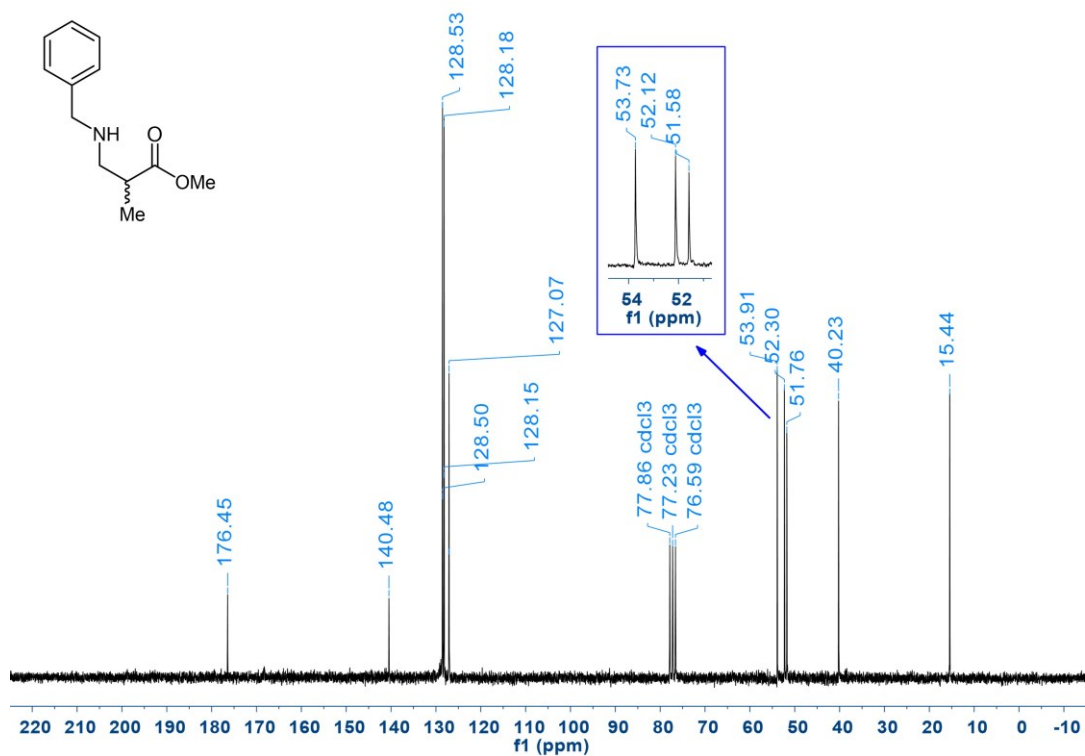

Figure S23. <sup>13</sup>C NMR (200 MHz, CDCl<sub>3</sub>) for (rac)-methyl 3-(benzylamino)-2-methylpropanoate 19.

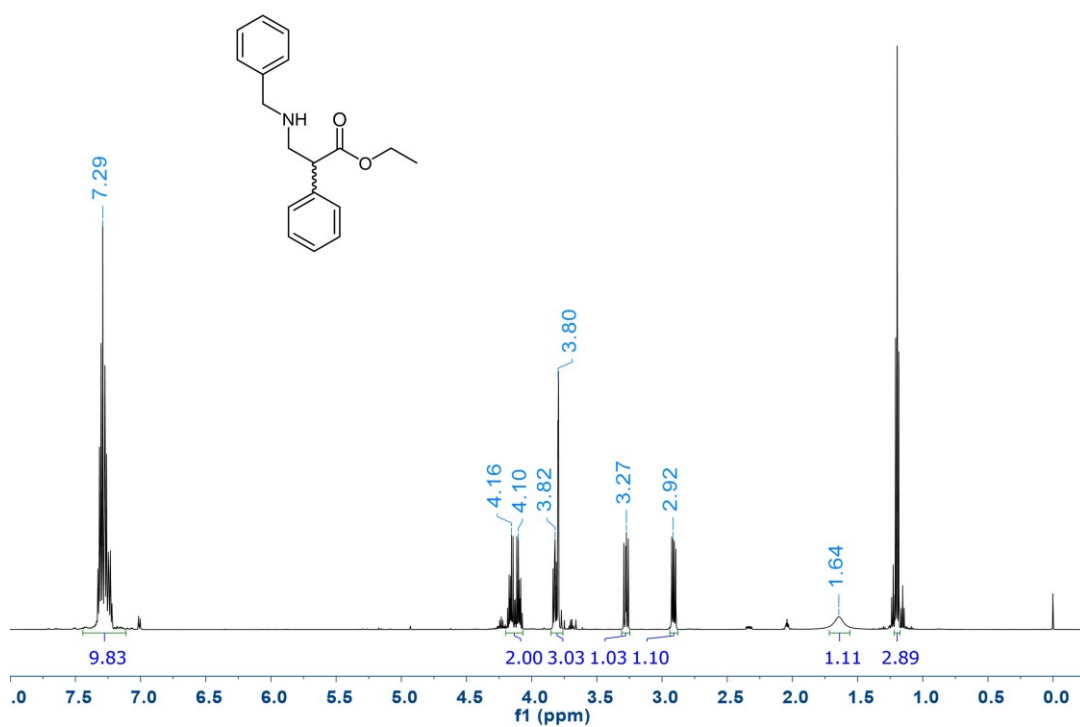

Figure S24. <sup>1</sup>H NMR (500 MHz, CDCl<sub>3</sub>) for *(rac)*-ethyl 3-(benzylamino)-2-phenylpropanoate **21**.

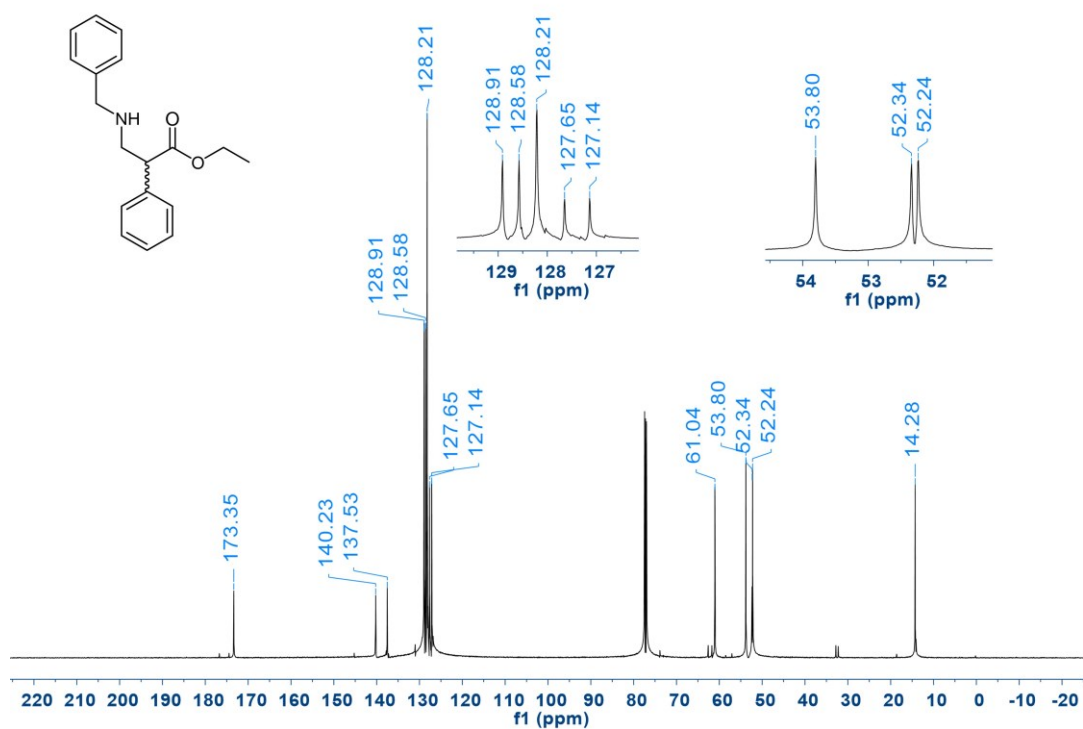

Figure S25. <sup>13</sup>C NMR (125 MHz, CDCl<sub>3</sub>) for *(rac)*-ethyl 3-(benzylamino)-2-phenylpropanoate **21**.

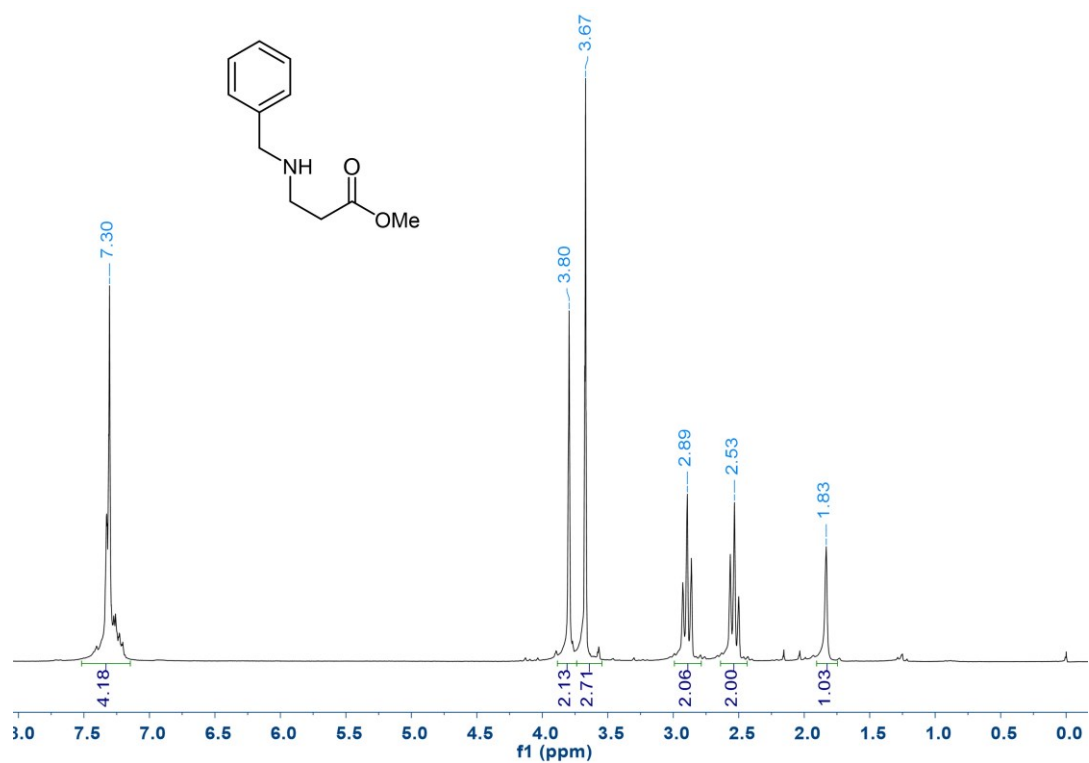

Figure S26.  $^1\text{H}$  NMR (200 MHz,  $\text{CDCl}_3$ ) for methyl 3-(benzylamino)propanoate 23.

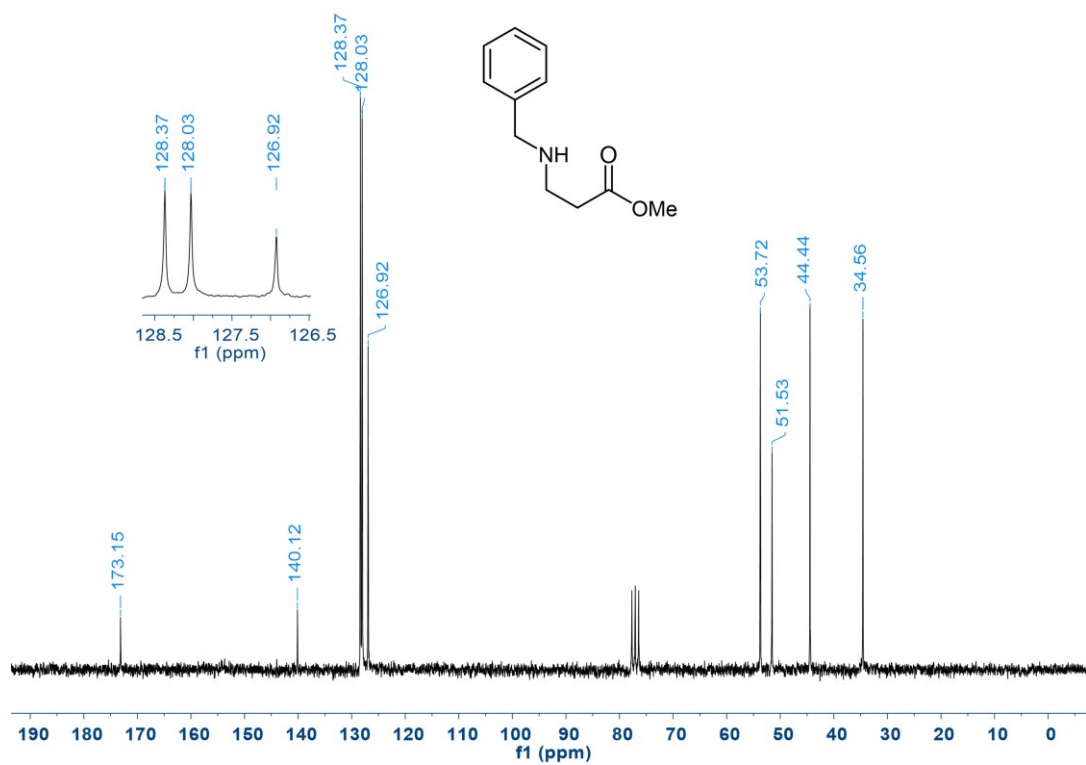

Figure S27.  $^{13}\text{C}$  NMR (50 MHz,  $\text{CDCl}_3$ ) for methyl 3-(benzylamino)propanoate 23.

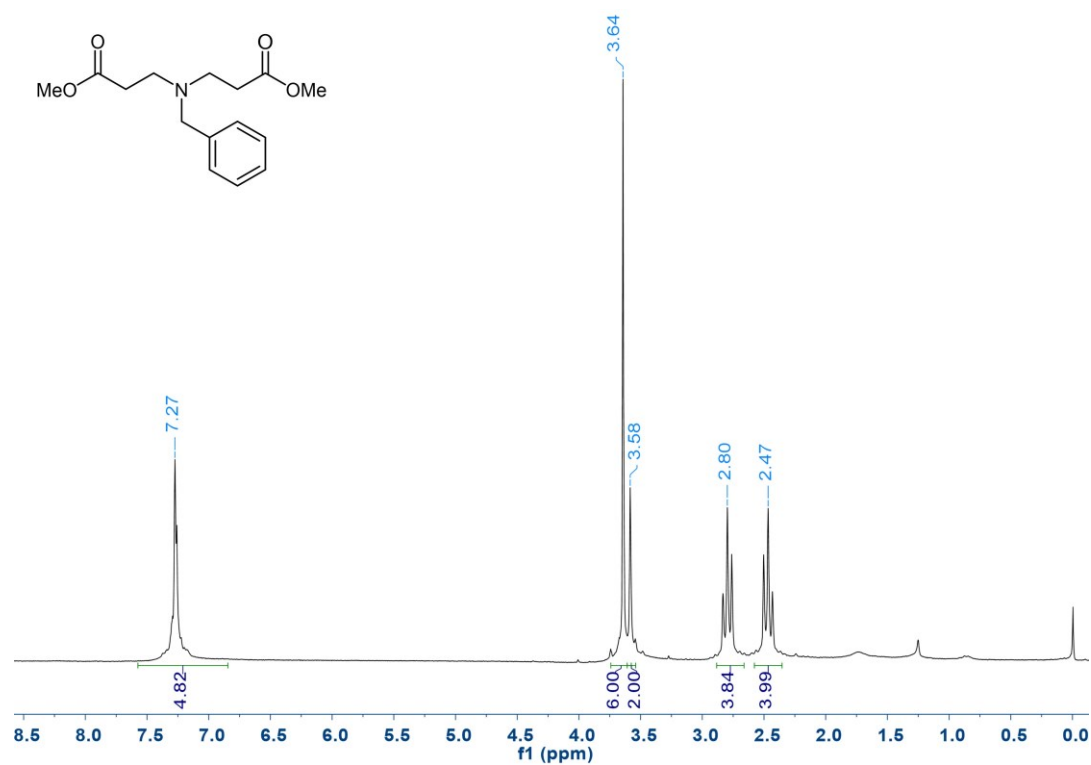

Figure S28. <sup>1</sup>H NMR (200 MHz, CDCl<sub>3</sub>) for dimethyl 3,3'-(benzylazanediyl)dipropionate 24.

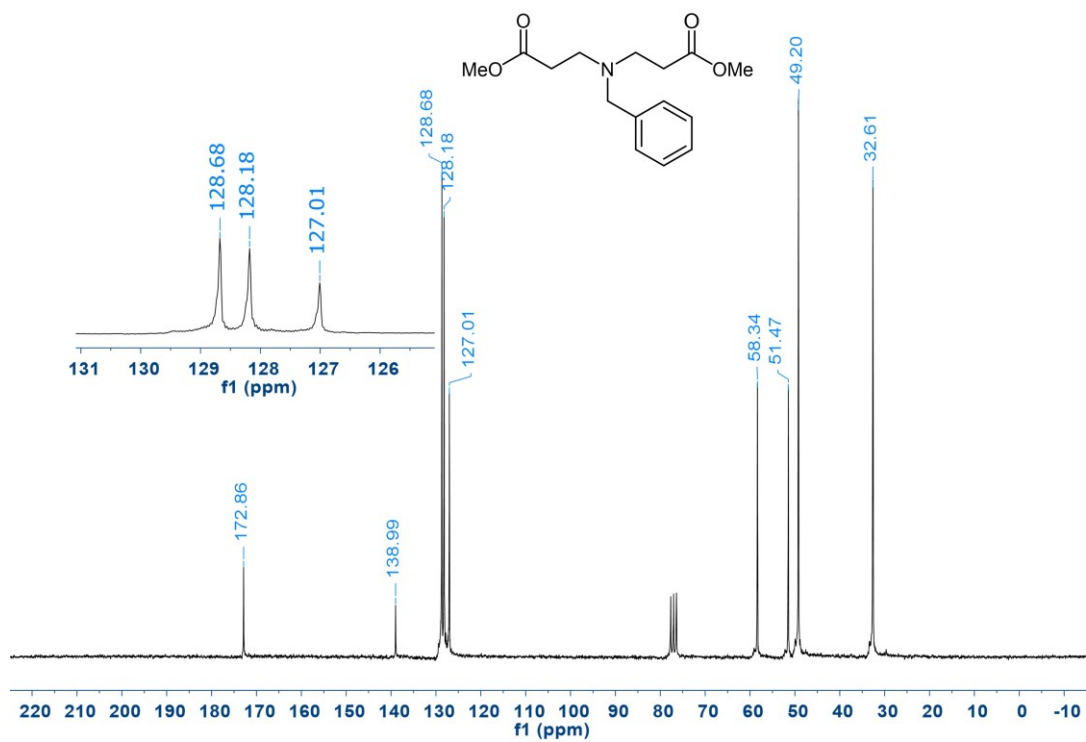

Figure S29. <sup>13</sup>C NMR (50 MHz, CDCl<sub>3</sub>) for dimethyl 3,3'-(benzylazanediyl)dipropionate 24.
